# Supplementary material for: Blood Pressure Changes in 1610 Subjects With and Without Antihypertensive Medication During Long‐Term Fasting
Source: PubMed Central journal article supplement — J Am Heart Assoc. 2020 Nov 23;9(23):e018649. doi: 10.1161/JAHA.120.018649 (PMC7763762; doi:10.1161/jaha.120.018649), 2020-11-23
Supplement: JAH3-9-e018649-s001.pdf [file JAH3-9-e018649-s001.pdf]

## **SUPPLEMENTAL MATERIAL**

**Table S1. Number of individuals with available measurements.** The first three columns indicate the number of normotensive (NT), hypertensive non-medicated (HTNM), and medicated (HTM) subjects at a given day of the study. Numbers are decreasing since fasting days were different for different subjects. We also presented the number of SBP (N\_sbp) and DBP (N\_dbp) values available as some of the measurements were missing.

|        | N (individuals in study) |     |     | N_sbp (N with SBP available) |     |     | N_dbp (N with DBP available) |     |     |
|--------|--------------------------|-----|-----|------------------------------|-----|-----|------------------------------|-----|-----|
|        | HTNM                     | HTM | NT  | HTNM                         | HTM | NT  | HTNM                         | HTM | NT  |
| Day 1  | 313                      | 377 | 920 | 306                          | 358 | 920 | 306                          | 358 | 920 |
| Day 2  | 313                      | 377 | 920 | 292                          | 359 | 879 | 292                          | 359 | 879 |
| Day 3  | 313                      | 377 | 920 | 294                          | 361 | 886 | 294                          | 361 | 886 |
| Day 4  | 313                      | 377 | 920 | 304                          | 366 | 874 | 304                          | 366 | 872 |
| Day 5  | 313                      | 375 | 919 | 298                          | 365 | 884 | 298                          | 365 | 884 |
| Day 6  | 309                      | 371 | 911 | 287                          | 359 | 868 | 287                          | 359 | 865 |
| Day 7  | 281                      | 303 | 760 | 263                          | 290 | 723 | 263                          | 290 | 723 |
| Day 8  | 238                      | 261 | 609 | 222                          | 253 | 576 | 222                          | 253 | 575 |
| Day 9  | 194                      | 229 | 502 | 180                          | 217 | 477 | 180                          | 217 | 477 |
| Day 10 | 154                      | 169 | 386 | 142                          | 161 | 369 | 142                          | 162 | 369 |
| Day 11 | 109                      | 124 | 261 | 98                           | 121 | 251 | 98                           | 121 | 253 |
| Day 12 | 91                       | 99  | 190 | 84                           | 96  | 176 | 85                           | 96  | 176 |
| Day 13 | 79                       | 83  | 161 | 76                           | 79  | 144 | 76                           | 79  | 144 |
| Day 14 | 71                       | 77  | 141 | 68                           | 74  | 131 | 68                           | 74  | 131 |
| Day 15 | 60                       | 73  | 125 | 55                           | 71  | 120 | 55                           | 70  | 120 |
| Day 16 | 47                       | 61  | 92  | 46                           | 60  | 86  | 46                           | 60  | 86  |
| Day 17 | 27                       | 33  | 46  | 27                           | 33  | 45  | 27                           | 33  | 45  |
| Day 18 | 18                       | 25  | 31  | 18                           | 24  | 31  | 18                           | 24  | 31  |
| Day 19 | 14                       | 20  | 23  | 13                           | 20  | 23  | 13                           | 20  | 24  |
| Day 20 | 12                       | 19  | 18  | 12                           | 18  | 17  | 12                           | 18  | 17  |
| REF1   | 312                      | 377 | 917 | 269                          | 350 | 809 | 269                          | 349 | 809 |
| REF2   | 290                      | 360 | 872 | 234                          | 305 | 713 | 234                          | 305 | 714 |
| REF3   | 210                      | 287 | 654 | 152                          | 206 | 456 | 152                          | 206 | 456 |
| REF4   | 102                      | 120 | 268 | 63                           | 74  | 162 | 63                           | 74  | 162 |
| FUP 1  | 313                      | 377 | 920 | 88                           | 123 | 237 | 87                           | 125 | 237 |
| FUP 2  | 313                      | 377 | 920 | 49                           | 71  | 136 | 49                           | 71  | 135 |
| FUP 3  | 313                      | 377 | 920 | 29                           | 55  | 105 | 28                           | 55  | 105 |

SBP indicates systolic blood pressure; N\_sbp, number of available SBP values; DBP, diastolic blood pressure; N\_dbp, number of available DBP values; HTNM, hypertensive non-medicated; HTM, hypertensive medicated; NT, normotensive; REF, food reintroduction; FUP, follow-up.

**Table S2. Statistical significance of the day-to-day difference to baselines for SBP.**

Estimates and their SE of least square means, as well as the Tukey adjusted p-value, from a linear-mixed model adjusting for sex and BMI are provided for normotensive (NT), hypertensive non-medicated (HTNM), and medicated (HTM).

| SBP<br>contrast | HTNM     |     |         | HTM      |     |         | NT       |     |         |
|-----------------|----------|-----|---------|----------|-----|---------|----------|-----|---------|
|                 | estimate | SE  | p-value | estimate | SE  | p-value | estimate | SE  | p-value |
| Day 1 - Day 2   | 7.5      | 0.8 | 3.6E-13 | 0.9      | 0.7 | 1.0E+00 | -0.9     | 0.5 | 1E+00   |
| Day 1 - Day 3   | 9.4      | 0.8 | 0.0E+00 | 1.7      | 0.7 | 8.8E-01 | 0.7      | 0.5 | 1E+00   |
| Day 1 - Day 4   | 10.3     | 0.8 | 0.0E+00 | 2.9      | 0.7 | 2.7E-02 | 0.6      | 0.5 | 1E+00   |
| Day 1 - Day 5   | 11.9     | 0.8 | 0.0E+00 | 4.0      | 0.7 | 2.2E-05 | 0.9      | 0.5 | 1E+00   |
| Day 1 - Day 6   | 12.8     | 0.8 | 0.0E+00 | 5.0      | 0.7 | 8.9E-09 | 1.5      | 0.5 | 3E-01   |
| Day 1 - Day 7   | 13.1     | 0.8 | 0.0E+00 | 6.1      | 0.8 | 5.6E-12 | 1.8      | 0.5 | 8E-02   |
| Day 1 - Day 8   | 15.6     | 0.9 | 0.0E+00 | 7.1      | 0.8 | 2.6E-13 | 2.3      | 0.5 | 7E-03   |
| Day 1 - Day 9   | 15.9     | 1.0 | 0.0E+00 | 7.7      | 0.9 | 2.1E-13 | 2.1      | 0.6 | 4E-02   |
| Day 1 - Day 10  | 15.8     | 1.0 | 0.0E+00 | 8.5      | 1.0 | 2.2E-13 | 3.5      | 0.6 | 5E-06   |
| Day 1 - Day 11  | 16.9     | 1.2 | 0.0E+00 | 9.0      | 1.1 | 3.8E-13 | 4.1      | 0.7 | 6E-06   |
| Day 1 - Day 12  | 17.1     | 1.3 | 0.0E+00 | 8.0      | 1.2 | 4.7E-09 | 3.6      | 0.8 | 6E-03   |
| Day 1 - Day 13  | 18.2     | 1.3 | 0.0E+00 | 9.4      | 1.3 | 7.8E-11 | 5.0      | 0.9 | 7E-06   |
| Day 1 - Day 14  | 17.4     | 1.4 | 0.0E+00 | 9.7      | 1.3 | 1.1E-10 | 5.8      | 0.9 | 2E-07   |
| Day 1 - Day 15  | 19.2     | 1.5 | 0.0E+00 | 10.6     | 1.3 | 1.3E-12 | 6.3      | 1.0 | 4E-08   |
| Day 1 - Day 16  | 18.2     | 1.6 | 5.0E-14 | 11.3     | 1.4 | 2.2E-12 | 6.2      | 1.1 | 1E-05   |
| Day 1 - Day 17  | 20.6     | 2.1 | 2.2E-13 | 11.7     | 1.9 | 6.5E-07 | 4.6      | 1.5 | 3E-01   |
| Day 1 - Day 18  | 20.0     | 2.5 | 5.0E-13 | 10.9     | 2.3 | 9.6E-04 | 8.0      | 1.8 | 3E-03   |
| Day 1 - Day 19  | 22.3     | 2.9 | 5.1E-12 | 14.1     | 2.6 | 2.2E-05 | 6.0      | 2.0 | 4E-01   |
| Day 1 - Day 20  | 23.4     | 3.0 | 3.9E-12 | 10.9     | 2.6 | 8.6E-03 | 6.4      | 2.4 | 6E-01   |
| Day 1 - Day 21  | 19.4     | 3.3 | 2.0E-06 | 13.8     | 2.9 | 6.4E-04 | 3.6      | 2.5 | 1E+00   |
| Day 1 - REF1    | 16.7     | 0.8 | 0.0E+00 | 6.9      | 0.8 | 3.1E-13 | 3.2      | 0.5 | 4E-09   |
| Day 1 - REF2    | 20.2     | 0.9 | 0.0E+00 | 9.3      | 0.8 | 0.0E+00 | 4.2      | 0.5 | 3E-13   |
| Day 1 - REF3    | 16.6     | 1.0 | 0.0E+00 | 7.8      | 0.9 | 2.2E-13 | 3.6      | 0.6 | 1E-07   |
| Day 1 - REF4    | 18.2     | 1.4 | 0.0E+00 | 7.2      | 1.3 | 1.7E-05 | 3.2      | 0.9 | 5E-02   |
| Day 1 - FUP 1   | 16.1     | 1.2 | 0.0E+00 | 6.4      | 1.1 | 9.7E-07 | -0.7     | 0.7 | 1E+00   |
| Day 1 - FUP 2   | 17.6     | 1.6 | 1.1E-13 | 6.5      | 1.4 | 6.2E-04 | -1.7     | 0.9 | 1E+00   |
| Day 1 - FUP 3   | 15.2     | 2.1 | 6.6E-11 | 3.2      | 1.5 | 9.5E-01 | -1.5     | 1.1 | 1E+00   |

SBP indicates systolic blood pressure; SE, standard error; BMI, body mass index; HTNM, hypertensive non-medicated; HTM, hypertensive medicated; NT, normotensive; REF, food reintroduction; FUP, follow-up.

**Table S3. Statistical significance of the day-to-day difference to baselines for DBP.**

Estimates and their SE of least square means, as well as the Tukey adjusted p-value, from a linear-mixed model adjusting for sex and BMI are provided for normotensive (NT), hypertensive non-medicated (HTNM), and medicated (HTM).

| DBP<br>contrast | HTNM     |     |         | HTM      |     |         | NT       |     |         |
|-----------------|----------|-----|---------|----------|-----|---------|----------|-----|---------|
|                 | estimate | SE  | p-value | estimate | SE  | p-value | estimate | SE  | p-value |
| Day 1 - Day 2   | 3.9      | 0.5 | 2E-11   | 1.3      | 0.5 | 5.0E-01 | -0.1     | 0.3 | 1.0E+00 |
| Day 1 - Day 3   | 5.4      | 0.5 | 3E-13   | 1.8      | 0.5 | 2.9E-02 | 0.7      | 0.3 | 7.9E-01 |
| Day 1 - Day 4   | 6.4      | 0.5 | 0       | 3.0      | 0.5 | 2.3E-08 | 0.8      | 0.3 | 6.7E-01 |
| Day 1 - Day 5   | 7.2      | 0.5 | 0       | 3.2      | 0.5 | 2.0E-09 | 0.7      | 0.3 | 8.9E-01 |
| Day 1 - Day 6   | 7.5      | 0.5 | 0       | 3.9      | 0.5 | 3.3E-13 | 0.7      | 0.3 | 9.1E-01 |
| Day 1 - Day 7   | 8.2      | 0.5 | 0       | 4.1      | 0.5 | 4.7E-13 | 0.9      | 0.3 | 4.1E-01 |
| Day 1 - Day 8   | 8.3      | 0.6 | 0       | 4.6      | 0.5 | 2.1E-13 | 1.4      | 0.3 | 5.7E-03 |
| Day 1 - Day 9   | 8.8      | 0.6 | 0       | 4.6      | 0.5 | 2.8E-13 | 1.3      | 0.4 | 4.6E-02 |
| Day 1 - Day 10  | 9.2      | 0.7 | 0       | 5.3      | 0.6 | 2.5E-13 | 1.8      | 0.4 | 7.8E-04 |
| Day 1 - Day 11  | 9.6      | 0.8 | 0       | 6.2      | 0.7 | 3.8E-13 | 2.8      | 0.5 | 2.8E-07 |
| Day 1 - Day 12  | 9.6      | 0.8 | 0       | 6.4      | 0.7 | 2.6E-13 | 2.0      | 0.5 | 2.7E-02 |
| Day 1 - Day 13  | 10.2     | 0.8 | 0       | 5.6      | 0.8 | 7.6E-10 | 2.4      | 0.6 | 7.6E-03 |
| Day 1 - Day 14  | 10.3     | 0.9 | 0       | 5.8      | 0.8 | 1.8E-09 | 2.8      | 0.6 | 1.1E-03 |
| Day 1 - Day 15  | 10.1     | 0.9 | 3E-13   | 6.6      | 0.8 | 3.6E-12 | 4.3      | 0.6 | 1.3E-09 |
| Day 1 - Day 16  | 9.7      | 1.0 | 2E-13   | 6.5      | 0.9 | 2.7E-10 | 4.4      | 0.7 | 2.0E-07 |
| Day 1 - Day 17  | 12.0     | 1.3 | 3E-13   | 6.7      | 1.2 | 1.7E-05 | 2.8      | 0.9 | 4.0E-01 |
| Day 1 - Day 18  | 13.1     | 1.5 | 3E-13   | 6.0      | 1.5 | 1.1E-02 | 3.6      | 1.1 | 2.4E-01 |
| Day 1 - Day 19  | 12.2     | 1.8 | 1E-08   | 10.3     | 1.6 | 1.1E-07 | 2.6      | 1.3 | 9.6E-01 |
| Day 1 - Day 20  | 10.2     | 1.9 | 3E-05   | 4.8      | 1.6 | 3.9E-01 | 3.6      | 1.5 | 8.4E-01 |
| Day 1 - Day 21  | 12.3     | 2.1 | 2E-06   | 8.4      | 1.8 | 1.2E-03 | 2.4      | 1.6 | 1.0E+00 |
| Day 1 - REF1    | 9.2      | 0.5 | 0       | 4.6      | 0.5 | 2.8E-13 | 1.7      | 0.3 | 5.3E-06 |
| Day 1 - REF2    | 10.0     | 0.5 | 0       | 5.1      | 0.5 | 2.8E-13 | 2.2      | 0.3 | 3.1E-10 |
| Day 1 - REF3    | 8.8      | 0.6 | 0       | 5.0      | 0.6 | 1.9E-13 | 2.0      | 0.4 | 6.8E-06 |
| Day 1 - REF4    | 10.1     | 0.9 | 0       | 5.9      | 0.8 | 3.5E-10 | 1.4      | 0.5 | 7.1E-01 |
| Day 1 - FUP 1   | 10.3     | 0.8 | 0       | 5.2      | 0.7 | 4.3E-12 | 2.3      | 0.5 | 2.0E-04 |
| Day 1 - FUP 2   | 10.1     | 1.0 | 3E-13   | 6.9      | 0.9 | 8.3E-13 | 1.6      | 0.6 | 6.0E-01 |
| Day 1 - FUP 3   | 9.4      | 1.3 | 2E-10   | 4.0      | 0.9 | 6.8E-03 | 1.2      | 0.7 | 9.9E-01 |

DBP indicates diastolic blood pressure; SE, standard error; BMI, body mass index; HTNM, hypertensive non-medicated; HTM, hypertensive medicated; NT, normotensive; REF, food reintroduction; FUP, follow-up.

**Table S4. Statistical significance of the day-to-day difference to baselines for SBP in males.** Estimates and their SE of least square means, as well as the Tukey adjusted p-value, from a linear-mixed model adjusting for BMI are provided for normotensive (NT), hypertensive non-medicated (HTNM), and medicated (HTM).

| SBP<br>MALES<br>contrast | HTNM     |     |         | HTM      |     |         | NT       |     |         |
|--------------------------|----------|-----|---------|----------|-----|---------|----------|-----|---------|
|                          | estimate | SE  | p-value | estimate | SE  | p-value | estimate | SE  | p-value |
| Day 1 - Day 2            | 6.3      | 1.2 | 1E-04   | 0.9      | 1.0 | 1E+00   | -2.0     | 0.8 | 8E-01   |
| Day 1 - Day 3            | 8.7      | 1.2 | 4E-10   | 1.0      | 1.0 | 1E+00   | 0.4      | 0.8 | 1E+00   |
| Day 1 - Day 4            | 9.7      | 1.2 | 2E-12   | 3.1      | 1.0 | 2E-01   | -0.3     | 0.8 | 1E+00   |
| Day 1 - Day 5            | 11.0     | 1.2 | 6E-12   | 3.5      | 1.0 | 9E-02   | 0.3      | 0.8 | 1E+00   |
| Day 1 - Day 6            | 11.4     | 1.2 | 4E-12   | 5.2      | 1.0 | 6E-05   | 1.0      | 0.8 | 1E+00   |
| Day 1 - Day 7            | 12.2     | 1.3 | 5E-13   | 7.2      | 1.0 | 2E-09   | 1.3      | 0.9 | 1E+00   |
| Day 1 - Day 8            | 16.2     | 1.3 | 7E-12   | 7.5      | 1.1 | 3E-09   | 0.9      | 1.0 | 1E+00   |
| Day 1 - Day 9            | 15.9     | 1.4 | 5E-12   | 8.0      | 1.2 | 2E-09   | 2.3      | 1.0 | 9E-01   |
| Day 1 - Day 10           | 15.0     | 1.6 | 3E-12   | 11.4     | 1.3 | 4E-12   | 3.8      | 1.1 | 1E-01   |
| Day 1 - Day 11           | 17.9     | 1.8 | 1E-11   | 11.1     | 1.4 | 5E-12   | 4.9      | 1.4 | 8E-02   |
| Day 1 - Day 12           | 15.4     | 1.9 | 5E-12   | 10.6     | 1.6 | 8E-09   | 4.5      | 1.6 | 4E-01   |
| Day 1 - Day 13           | 18.5     | 2.0 | 3E-13   | 10.8     | 1.7 | 8E-08   | 5.4      | 1.7 | 3E-01   |
| Day 1 - Day 14           | 17.3     | 2.0 | 4E-12   | 11.2     | 1.7 | 4E-08   | 7.9      | 1.9 | 1E-02   |
| Day 1 - Day 15           | 19.2     | 2.3 | 2E-12   | 12.4     | 1.8 | 1E-09   | 7.4      | 1.8 | 2E-02   |
| Day 1 - Day 16           | 18.4     | 2.5 | 3E-11   | 12.6     | 1.9 | 2E-08   | 7.0      | 2.2 | 2E-01   |
| Day 1 - Day 17           | 22.4     | 3.0 | 5E-11   | 13.6     | 2.5 | 3E-05   | 7.0      | 3.0 | 8E-01   |
| Day 1 - Day 18           | 24.1     | 3.4 | 1E-09   | 17.3     | 3.1 | 8E-06   | 11.1     | 3.6 | 3E-01   |
| Day 1 - Day 19           | 23.8     | 4.2 | 5E-06   | 15.6     | 3.4 | 2E-03   | 11.8     | 5.8 | 1E+00   |
| Day 1 - Day 20           | 24.7     | 4.6 | 2E-05   | 12.0     | 3.4 | 9E-02   | 7.4      | 5.8 | 1E+00   |
| Day 1 - Day 21           | 25.7     | 5.1 | 1E-04   | 17.9     | 4.1 | 5E-03   | 15.0     | 7.1 | 9E-01   |
| Day 1 - REF1             | 18.4     | 1.3 | 4E-14   | 8.4      | 1.0 | 0E+00   | 2.2      | 0.9 | 7E-01   |
| Day 1 - REF2             | 20.8     | 1.3 | 5E-12   | 10.5     | 1.1 | 4E-12   | 4.6      | 0.9 | 2E-04   |
| Day 1 - REF3             | 17.1     | 1.5 | 2E-12   | 9.1      | 1.2 | 3E-11   | 3.7      | 1.1 | 1E-01   |
| Day 1 - REF4             | 21.4     | 2.2 | 4E-12   | 7.0      | 1.7 | 1E-02   | 5.6      | 1.8 | 3E-01   |
| Day 1 - FUP 1            | 13.1     | 1.9 | 2E-09   | 7.6      | 1.5 | 9E-05   | -2.8     | 1.3 | 9E-01   |
| Day 1 - FUP 2            | 14.4     | 2.4 | 4E-07   | 6.2      | 2.0 | 2E-01   | -1.6     | 1.9 | 1E+00   |
| Day 1 - FUP 3            | 8.5      | 3.3 | 7E-01   | 5.4      | 2.4 | 9E-01   | -3.0     | 1.8 | 1E+00   |

SBP indicates systolic blood pressure; SE, standard error; BMI, body mass index; HTNM, hypertensive non-medicated; HTM, hypertensive medicated; NT, normotensive; REF, food reintroduction; FUP, follow-up.

**Table S5. Statistical significance of the day-to-day difference to baselines for DBP in males.** Estimates and their SE of least square means, as well as the Tukey adjusted p-value, from a linear-mixed model adjusting for BMI are provided for normotensive (NT), hypertensive non-medicated (HTNM), and medicated (HTM).

| DBP<br>MALES   | HTNM     |          |       | HTM     |          |       | NT      |          |       |
|----------------|----------|----------|-------|---------|----------|-------|---------|----------|-------|
|                | contrast | estimate | SE    | p-value | estimate | SE    | p-value | estimate | SE    |
| Day 1 - Day 2  | 3.8      | 0.8      | 2E-04 | 1.7     | 0.6      | 6E-01 | -0.8    | 0.5      | 1E+00 |
| Day 1 - Day 3  | 5.2      | 0.8      | 2E-09 | 2.0     | 0.6      | 2E-01 | 0.5     | 0.5      | 1E+00 |
| Day 1 - Day 4  | 7.1      | 0.7      | 0E+00 | 4.1     | 0.6      | 9E-09 | 0.9     | 0.5      | 1E+00 |
| Day 1 - Day 5  | 7.3      | 0.8      | 7E-13 | 3.9     | 0.6      | 8E-08 | 0.2     | 0.5      | 1E+00 |
| Day 1 - Day 6  | 7.8      | 0.8      | 3E-12 | 5.0     | 0.6      | 4E-12 | 1.2     | 0.5      | 9E-01 |
| Day 1 - Day 7  | 7.5      | 0.8      | 2E-12 | 4.9     | 0.7      | 4E-11 | 1.3     | 0.6      | 9E-01 |
| Day 1 - Day 8  | 8.5      | 0.8      | 1E-12 | 4.8     | 0.7      | 6E-10 | 1.6     | 0.6      | 6E-01 |
| Day 1 - Day 9  | 8.9      | 0.9      | 4E-12 | 5.1     | 0.7      | 5E-10 | 2.1     | 0.6      | 2E-01 |
| Day 1 - Day 10 | 9.9      | 1.0      | 4E-12 | 7.1     | 0.8      | 4E-12 | 1.5     | 0.7      | 9E-01 |
| Day 1 - Day 11 | 9.9      | 1.1      | 2E-12 | 7.6     | 0.9      | 6E-12 | 3.8     | 0.9      | 2E-03 |
| Day 1 - Day 12 | 9.3      | 1.2      | 4E-13 | 7.2     | 1.0      | 9E-11 | 2.9     | 1.0      | 4E-01 |
| Day 1 - Day 13 | 10.0     | 1.2      | 1E-13 | 5.8     | 1.1      | 2E-05 | 2.4     | 1.1      | 9E-01 |
| Day 1 - Day 14 | 11.0     | 1.3      | 2E-12 | 5.8     | 1.1      | 3E-05 | 5.1     | 1.2      | 5E-03 |
| Day 1 - Day 15 | 10.2     | 1.4      | 2E-10 | 7.2     | 1.1      | 3E-08 | 6.1     | 1.2      | 5E-05 |
| Day 1 - Day 16 | 11.5     | 1.5      | 3E-11 | 6.6     | 1.2      | 1E-05 | 5.1     | 1.4      | 4E-02 |
| Day 1 - Day 17 | 13.7     | 1.9      | 2E-10 | 7.2     | 1.6      | 2E-03 | 3.8     | 1.8      | 1E+00 |
| Day 1 - Day 18 | 15.0     | 2.2      | 1E-09 | 8.8     | 1.9      | 2E-03 | 3.8     | 2.2      | 1E+00 |
| Day 1 - Day 19 | 15.6     | 2.6      | 9E-07 | 13.3    | 2.1      | 2E-07 | 5.7     | 3.6      | 1E+00 |
| Day 1 - Day 20 | 11.9     | 2.8      | 8E-03 | 3.9     | 2.1      | 1E+00 | 6.0     | 3.6      | 1E+00 |
| Day 1 - Day 21 | 14.5     | 3.2      | 1E-03 | 6.7     | 2.6      | 7E-01 | 11.6    | 4.4      | 7E-01 |
| Day 1 - REF1   | 10.0     | 0.8      | 3E-12 | 6.3     | 0.6      | 5E-12 | 1.9     | 0.5      | 9E-02 |
| Day 1 - REF2   | 10.9     | 0.8      | 2E-12 | 5.9     | 0.7      | 2E-13 | 3.0     | 0.6      | 8E-05 |
| Day 1 - REF3   | 9.7      | 1.0      | 4E-12 | 6.1     | 0.8      | 2E-12 | 2.6     | 0.7      | 3E-02 |
| Day 1 - REF4   | 12.4     | 1.4      | 4E-12 | 5.9     | 1.0      | 6E-06 | 1.5     | 1.1      | 1E+00 |
| Day 1 - FUP 1  | 8.7      | 1.2      | 7E-11 | 6.5     | 0.9      | 7E-10 | -1.1    | 0.8      | 1E+00 |
| Day 1 - FUP 2  | 7.4      | 1.5      | 2E-04 | 7.7     | 1.2      | 1E-07 | -1.8    | 1.2      | 1E+00 |
| Day 1 - FUP 3  | 6.1      | 2.1      | 4E-01 | 5.3     | 1.5      | 8E-02 | -2.9    | 1.1      | 6E-01 |

DBP indicates diastolic blood pressure; SE, standard error; BMI, body mass index; HTNM, hypertensive non-medicated; HTM, hypertensive medicated; NT, normotensive; REF, food reintroduction; FUP, follow-up.

**Table S6. Statistical significance of the day-to-day difference to baselines for SBP in females.** Estimates and their SE of least square means, as well as the Tukey adjusted p-value, from a linear-mixed model adjusting for BMI are provided for normotensive (NT), hypertensive non-medicated (HTNM), and medicated (HTM).

| SBP FEMALES    | HTNM     |          |       | HTM     |          |       | NT      |          |       |
|----------------|----------|----------|-------|---------|----------|-------|---------|----------|-------|
|                | contrast | estimate | SE    | p-value | estimate | SE    | p-value | estimate | SE    |
| Day 1 - Day 2  | 8.5      | 1.1      | 0E+00 | 0.8     | 1.1      | 1E+00 | -0.4    | 0.6      | 1E+00 |
| Day 1 - Day 3  | 10.1     | 1.1      | 0E+00 | 2.7     | 1.1      | 8E-01 | 0.9     | 0.6      | 1E+00 |
| Day 1 - Day 4  | 10.9     | 1.1      | 0E+00 | 2.5     | 1.1      | 9E-01 | 1.0     | 0.6      | 1E+00 |
| Day 1 - Day 5  | 12.7     | 1.1      | 0E+00 | 4.7     | 1.1      | 1E-02 | 1.2     | 0.6      | 9E-01 |
| Day 1 - Day 6  | 14.0     | 1.1      | 0E+00 | 4.7     | 1.1      | 1E-02 | 1.7     | 0.6      | 4E-01 |
| Day 1 - Day 7  | 13.9     | 1.1      | 0E+00 | 4.5     | 1.2      | 5E-02 | 2.0     | 0.6      | 1E-01 |
| Day 1 - Day 8  | 15.1     | 1.2      | 0E+00 | 6.5     | 1.3      | 1E-04 | 2.9     | 0.6      | 2E-03 |
| Day 1 - Day 9  | 16.0     | 1.3      | 0E+00 | 7.3     | 1.3      | 1E-05 | 2.0     | 0.7      | 3E-01 |
| Day 1 - Day 10 | 16.5     | 1.4      | 0E+00 | 4.8     | 1.5      | 2E-01 | 3.4     | 0.7      | 1E-03 |
| Day 1 - Day 11 | 16.0     | 1.6      | 0E+00 | 5.9     | 1.7      | 1E-01 | 3.8     | 0.8      | 2E-03 |
| Day 1 - Day 12 | 18.8     | 1.7      | 0E+00 | 4.5     | 1.8      | 8E-01 | 3.2     | 1.0      | 2E-01 |
| Day 1 - Day 13 | 17.9     | 1.8      | 0E+00 | 7.4     | 2.0      | 4E-02 | 4.9     | 1.0      | 8E-04 |
| Day 1 - Day 14 | 17.4     | 1.9      | 0E+00 | 7.4     | 2.1      | 8E-02 | 5.2     | 1.1      | 5E-04 |
| Day 1 - Day 15 | 19.3     | 2.0      | 0E+00 | 8.1     | 2.1      | 3E-02 | 5.9     | 1.1      | 9E-05 |
| Day 1 - Day 16 | 18.0     | 2.1      | 0E+00 | 9.5     | 2.2      | 7E-03 | 6.0     | 1.3      | 2E-03 |
| Day 1 - Day 17 | 18.9     | 2.8      | 7E-09 | 8.8     | 3.0      | 4E-01 | 3.8     | 1.7      | 9E-01 |
| Day 1 - Day 18 | 15.3     | 3.5      | 4E-03 | 1.9     | 3.5      | 1E+00 | 7.0     | 2.1      | 1E-01 |
| Day 1 - Day 19 | 21.0     | 4.0      | 8E-05 | 11.8    | 4.1      | 4E-01 | 5.1     | 2.2      | 8E-01 |
| Day 1 - Day 20 | 22.4     | 4.0      | 1E-05 | 9.2     | 4.1      | 9E-01 | 6.2     | 2.6      | 8E-01 |
| Day 1 - Day 21 | 14.4     | 4.4      | 2E-01 | 9.2     | 4.1      | 9E-01 | 1.9     | 2.6      | 1E+00 |
| Day 1 - REF1   | 15.3     | 1.1      | 0E+00 | 4.8     | 1.1      | 7E-03 | 3.7     | 0.6      | 2E-08 |
| Day 1 - REF2   | 19.7     | 1.2      | 0E+00 | 7.7     | 1.2      | 3E-08 | 4.1     | 0.6      | 9E-10 |
| Day 1 - REF3   | 16.3     | 1.3      | 0E+00 | 6.2     | 1.3      | 8E-04 | 3.6     | 0.7      | 4E-05 |
| Day 1 - REF4   | 15.7     | 1.9      | 0E+00 | 8.2     | 2.2      | 5E-02 | 2.5     | 1.0      | 7E-01 |
| Day 1 - FUP 1  | 18.5     | 1.6      | 0E+00 | 4.8     | 1.6      | 3E-01 | 0.4     | 0.9      | 1E+00 |
| Day 1 - FUP 2  | 20.5     | 2.1      | 0E+00 | 6.6     | 1.9      | 1E-01 | -1.7    | 1.1      | 1E+00 |
| Day 1 - FUP 3  | 19.8     | 2.6      | 0E+00 | 1.3     | 2.0      | 1E+00 | -0.5    | 1.3      | 1E+00 |

SBP indicates systolic blood pressure; SE, standard error; BMI, body mass index; HTNM, hypertensive non-medicated; HTM, hypertensive medicated; NT, normotensive; REF, food reintroduction; FUP, follow-up.

**Table S7. Statistical significance of the day-to-day difference to baselines for DBP in females.** Estimates and their SE of least square means, as well as the Tukey adjusted p-value, from a linear-mixed model adjusting for BMI are provided for normotensive (NT), hypertensive non-medicated (HTNM), and medicated (HTM).

| DBP FEMALEES   | HTNM     |     |         | HTM      |     |         | NT       |     |         |
|----------------|----------|-----|---------|----------|-----|---------|----------|-----|---------|
|                | estimate | SE  | p-value | estimate | SE  | p-value | estimate | SE  | p-value |
| Day 1 - Day 2  | 3.9      | 0.7 | 7E-06   | 0.8      | 0.7 | 1E+00   | 0.3      | 0.4 | 1E+00   |
| Day 1 - Day 3  | 5.5      | 0.7 | 0E+00   | 1.6      | 0.7 | 9E-01   | 0.8      | 0.3 | 8E-01   |
| Day 1 - Day 4  | 5.9      | 0.7 | 0E+00   | 1.6      | 0.7 | 9E-01   | 0.7      | 0.4 | 1E+00   |
| Day 1 - Day 5  | 7.1      | 0.7 | 0E+00   | 2.2      | 0.7 | 3E-01   | 0.9      | 0.3 | 7E-01   |
| Day 1 - Day 6  | 7.2      | 0.7 | 0E+00   | 2.4      | 0.7 | 1E-01   | 0.4      | 0.4 | 1E+00   |
| Day 1 - Day 7  | 8.8      | 0.7 | 0E+00   | 2.9      | 0.8 | 4E-02   | 0.7      | 0.4 | 1E+00   |
| Day 1 - Day 8  | 8.1      | 0.8 | 0E+00   | 4.3      | 0.8 | 3E-05   | 1.3      | 0.4 | 2E-01   |
| Day 1 - Day 9  | 8.6      | 0.8 | 0E+00   | 3.9      | 0.8 | 9E-04   | 1.0      | 0.4 | 9E-01   |
| Day 1 - Day 10 | 8.6      | 0.9 | 0E+00   | 2.8      | 0.9 | 3E-01   | 2.0      | 0.5 | 5E-03   |
| Day 1 - Day 11 | 9.2      | 1.0 | 0E+00   | 4.2      | 1.1 | 3E-02   | 2.4      | 0.5 | 2E-03   |
| Day 1 - Day 12 | 9.9      | 1.1 | 0E+00   | 5.2      | 1.1 | 2E-03   | 1.7      | 0.6 | 6E-01   |
| Day 1 - Day 13 | 10.4     | 1.1 | 0E+00   | 5.5      | 1.2 | 3E-03   | 2.4      | 0.7 | 7E-02   |
| Day 1 - Day 14 | 9.7      | 1.2 | 0E+00   | 5.8      | 1.3 | 3E-03   | 2.0      | 0.7 | 4E-01   |
| Day 1 - Day 15 | 10.0     | 1.2 | 0E+00   | 5.7      | 1.3 | 5E-03   | 3.6      | 0.7 | 2E-04   |
| Day 1 - Day 16 | 8.2      | 1.3 | 4E-07   | 6.5      | 1.4 | 1E-03   | 4.1      | 0.8 | 2E-04   |
| Day 1 - Day 17 | 10.4     | 1.8 | 1E-06   | 5.9      | 1.9 | 3E-01   | 2.4      | 1.1 | 9E-01   |
| Day 1 - Day 18 | 11.1     | 2.2 | 2E-04   | 2.3      | 2.2 | 1E+00   | 3.5      | 1.3 | 6E-01   |
| Day 1 - Day 19 | 8.9      | 2.5 | 1E-01   | 5.9      | 2.6 | 9E-01   | 2.1      | 1.4 | 1E+00   |
| Day 1 - Day 20 | 8.8      | 2.5 | 1E-01   | 6.4      | 2.6 | 8E-01   | 3.0      | 1.7 | 1E+00   |
| Day 1 - Day 21 | 10.4     | 2.8 | 5E-02   | 9.9      | 2.6 | 3E-02   | 1.0      | 1.7 | 1E+00   |
| Day 1 - REF1   | 8.6      | 0.7 | 0E+00   | 2.4      | 0.7 | 2E-01   | 1.6      | 0.4 | 2E-03   |
| Day 1 - REF2   | 9.3      | 0.7 | 0E+00   | 4.1      | 0.7 | 1E-05   | 1.9      | 0.4 | 6E-05   |
| Day 1 - REF3   | 8.0      | 0.8 | 0E+00   | 3.6      | 0.8 | 4E-03   | 1.8      | 0.4 | 7E-03   |
| Day 1 - REF4   | 8.3      | 1.2 | 1E-10   | 6.4      | 1.4 | 1E-03   | 1.3      | 0.6 | 9E-01   |
| Day 1 - FUP 1  | 11.4     | 1.0 | 0E+00   | 3.5      | 1.0 | 7E-02   | 4.1      | 0.6 | 0E+00   |
| Day 1 - FUP 2  | 12.5     | 1.4 | 0E+00   | 5.7      | 1.2 | 6E-04   | 2.8      | 0.7 | 1E-02   |
| Day 1 - FUP 3  | 11.6     | 1.7 | 1E-09   | 2.7      | 1.2 | 9E-01   | 3.7      | 0.8 | 2E-03   |

DBP indicates diastolic blood pressure; SE, standard error; BMI, body mass index; HTNM, hypertensive non-medicated; HTM, hypertensive medicated; NT, normotensive; REF, food reintroduction; FUP, follow-up.



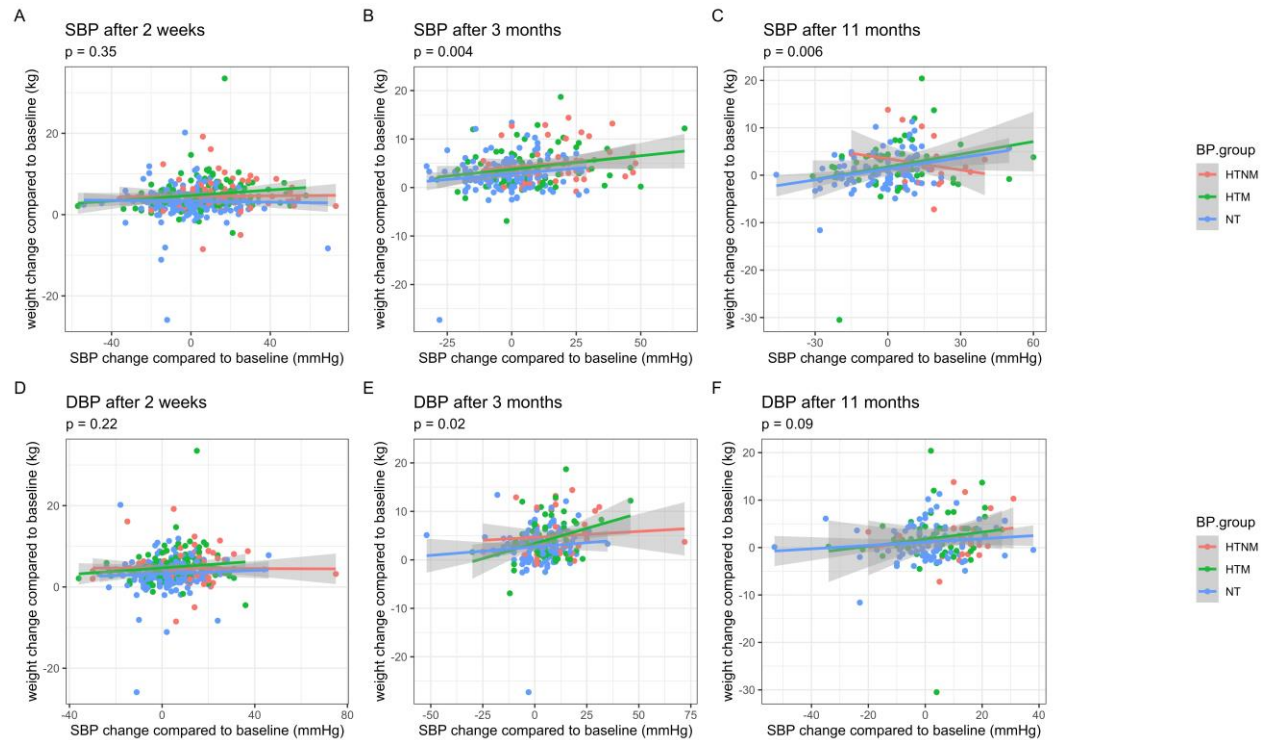

**Figure S1. The persistence of BP changes during the follow-up period correlates with the persistence of the weight loss.** Although the response to the follow-up were limited after two weeks ( $n=448$ ), three months ( $n=256$ ) and eleven months ( $n=188$ ), the correlation of the persistence of weight loss and BP changes suggests that long-term effects on BP could be caused by a persistence of the weight loss.

BP indicates blood pressure; SBP, systolic blood pressure; DBP, diastolic blood pressure.

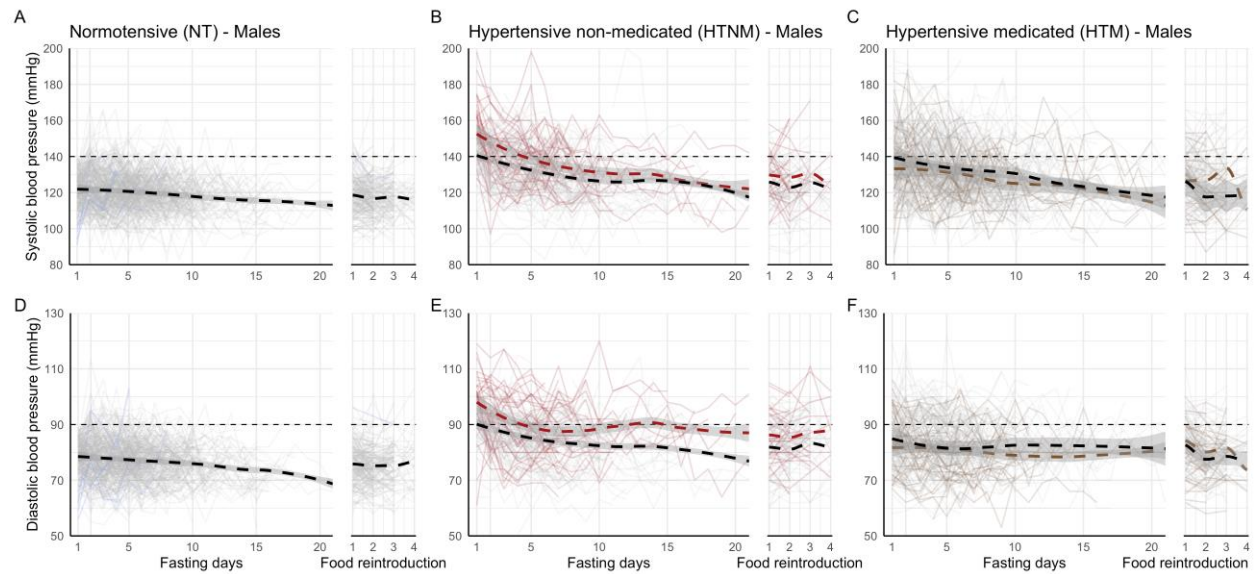

**Figure S2. Systolic and diastolic blood pressure during long-term fasting in male individuals.** The BP in normal (A, SBP ; D, DBP), hypertensive (B, SBP ; E, DBP) and medicated subjects (C, SBP ; F, DBP) is presented during the first 20 days of fast and the consecutive refeeding. Individual changes in BP are displayed as grey lines. Smoothed conditional means are plotted as dashed lines to illustrate global trends. A colour code is used to highlight subgroups consisting of 5 males with low blood pressure (<100/60 mmHg, in blue in panels A and D, no smoothed conditional means presented because of the low number of individuals), 36 males with very high BP (>160/100 mmHg, in red in panels B and E), as well as 58 males who stopped their antihypertensive treatment (in brown in panels E and F).

BP indicates blood pressure; SBP, systolic blood pressure; DBP, diastolic blood pressure.

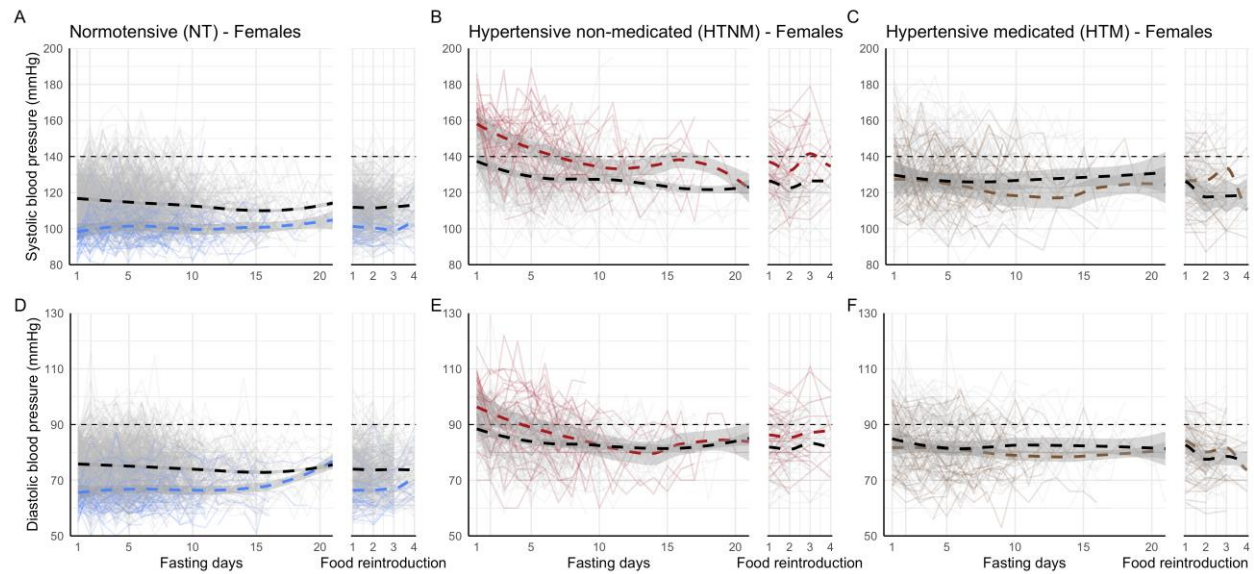

**Figure S3. Systolic and diastolic blood pressure during long-term fasting in female individuals.** The BP in normal (A, SBP ; D, DBP), hypertensive (B, SBP ; E, DBP) and medicated subjects (C, SBP ; F, DBP) is presented during the first 20 days of fast and the consecutive refeeding. Individual changes in BP are displayed as grey lines. Smoothed conditional means are plotted as dashed lines to illustrate global trends. A colour code is used to highlight subgroups consisting of 69 subjects with low blood pressure (<100/60 mmHg, in blue in panels A and D), 40 females with very high BP (>160/100 mmHg, in red in panels B and E), as well as 31 females who stopped their antihypertensive treatment (in brown in panels E and F).

BP indicates blood pressure; SBP, systolic blood pressure; DBP, diastolic blood pressure.
